# Supplementary material for: Insurer Resilience in an Era of Climate Change and Extreme Weather: An Econometric Analysis
Source: Preprints.org preprint supplement (doi:10.20944/preprints201901.0304.v1), 2019-01-30
Supplement: Supplementary file 1 [file supplementary]

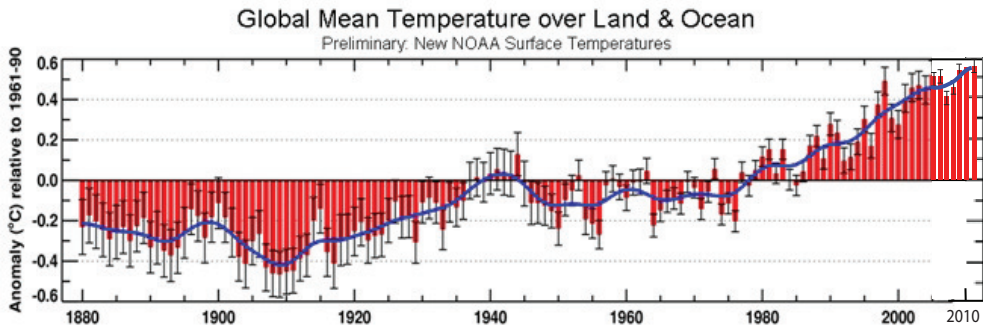

FIG. S1: Changes in global mean surface temperature relative to 1961–2013 (source: NOAA).

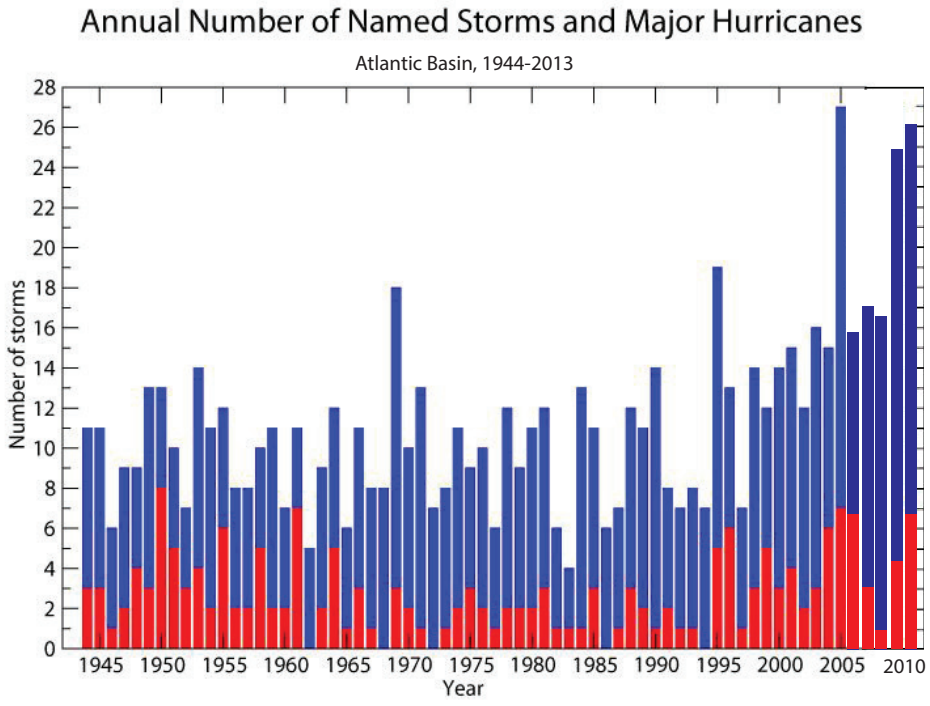

FIG. S2: Annual number of named tropical storms and major hurricanes: Atlantic, 1944–2013; named tropical storms are depicted in blue and major hurricanes are depicted in red (source: NOAA).
